# Supplementary material for: The AKT modulator A-443654 reduces α-synuclein expression and normalizes ER stress and autophagy
Source: PubMed Central journal article supplement (PMC8482485; doi:10.1016/j.jbc.2021.101191), 2021-09-11
Supplement: mmc1.pdf [file mmc1.pdf]

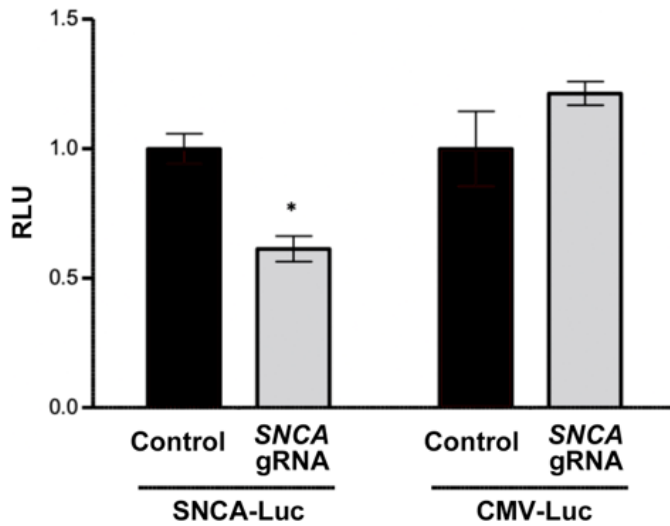

**Supplemental Fig. 1. Validation of screening cell lines using CRISPRi.** Normalized RLU of untransfected cells (control) or cells transfected with a guide RNA positioning the dCAS9-KRAB complex to just downstream of the *SNCA* transcriptional start site (*SNCA* gRNA). (\*= $p < 0.05$ , Student's t-test).

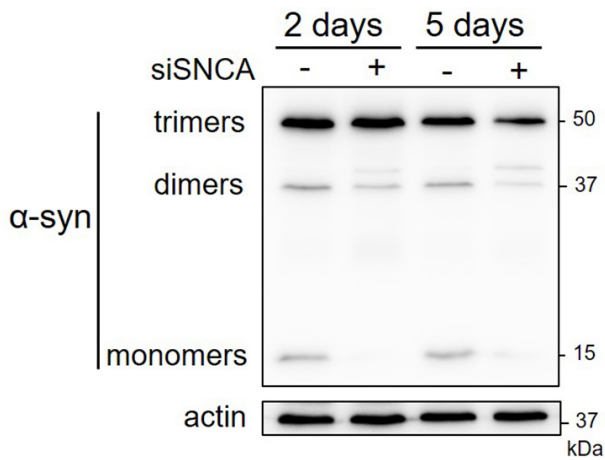

**Supplemental Fig. 2. Validation of  $\alpha$ -Synuclein antibody.** HEK-293 cells were transfected with *STAU1* siRNA for 2 or 5 days and  $\alpha$ -synuclein was detected using  $\alpha$ -synuclein antibody. Turnover of aggregated  $\alpha$ -synuclein (trimers) was observed for the 5 day timepoint.

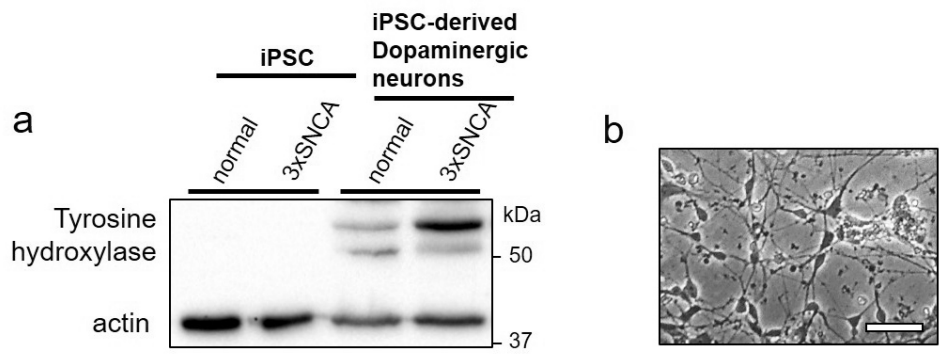

**Supplemental Fig. 3. Generation of iPSC-derived dopaminergic neurons.** (a) Western blot for tyrosine hydroxylase in extracts from iPSCs and iPSC-derived dopaminergic neurons. (b) Phase contrast image of iPSC-derived dopaminergic neurons. Scale bar, 50 μm.
